# Supplementary material for: A 3D printable diamond polymer composite: a novel material for fabrication of low cost thermally conducting devices
Source: Royal Society of Chemistry journal article supplement (doi:10.1039/c6ra05261d), 2016-01-01
Supplement: c6ra05261d1.pdf [file c6ra05261d1.pdf]

## Supplementary Information

### A composite from polymer and diamond microparticles: A novel material for fabrication of low cost thermally conducting devices using 3D printing

U. Kalsoom<sup>a</sup>, P. N. Nesterenko<sup>a</sup> and B. Paul<sup>a</sup>

<sup>a</sup> Australian Centre for Research on Separation Sciences (ACROSS), School of Physical Sciences, University of Tasmania, Australia, email: Brett.Paull@utas.edu.au.

#### Hunan Real Tech Superabrasive & Tool Co., Ltd. Particle size analyse report

|                           |  |              |  |                                                              |  |                       |  |
|---------------------------|--|--------------|--|--------------------------------------------------------------|--|-----------------------|--|
| Sample Name:2-4um         |  |              |  | Sample Owner:Hunan Real Tech Superabrasive & Tool Co., Ltd.  |  |                       |  |
| Medium Name:water         |  |              |  | Measure Dept: Hunan Real Tech Superabrasive & Tool Co., Ltd. |  |                       |  |
| Matter Index:2.645+0.000i |  | Optical:Mie  |  | Operator:Richard                                             |  | Test Date:2012-02-24  |  |
| Medium Index:1.333        |  | Mode:6.3 - 1 |  | Test Time:09:51:50                                           |  | Range : 0.1um - 341um |  |
| Remark:                   |  |              |  |                                                              |  |                       |  |

|             |                |                            |                    |
|-------------|----------------|----------------------------|--------------------|
| D50:3.054um | D[4,3]:3.026um | D[3,2]:2.834um             | Obscuration:16.08% |
| Span:0.614  | D[2,1]:2.620um | SSA:0.682m <sup>2</sup> /g | Residual:7.510%    |

|             |             |             |             |
|-------------|-------------|-------------|-------------|
| D10:2.047um | D50:3.054um | D90:3.925um | D95:4.219um |
|-------------|-------------|-------------|-------------|

| Diam um       | Diff% | Cumu% |
|---------------|-------|-------|---------------|-------|-------|---------------|-------|-------|---------------|-------|-------|
| 0.100 - 0.120 | 0     | 0     | 0.750 - 0.850 | 0     | 0     | 5.500 - 6.000 | 0     | 100   | 45.00 - 50.00 | 0     | 100   |
| 0.120 - 0.130 | 0     | 0     | 0.850 - 1.000 | 0     | 0     | 6.000 - 7.000 | 0     | 100   | 50.00 - 60.00 | 0     | 100   |
| 0.130 - 0.150 | 0     | 0     | 1.000 - 1.150 | 0     | 0     | 7.000 - 8.000 | 0     | 100   | 60.00 - 70.00 | 0     | 100   |
| 0.150 - 0.170 | 0     | 0     | 1.150 - 1.300 | 0.31  | 0.31  | 8.000 - 9.000 | 0     | 100   | 70.00 - 80.00 | 0     | 100   |
| 0.170 - 0.200 | 0     | 0     | 1.300 - 1.500 | 1.38  | 1.69  | 9.000 - 10.00 | 0     | 100   | 80.00 - 90.00 | 0     | 100   |
| 0.200 - 0.230 | 0     | 0     | 1.500 - 1.700 | 2.23  | 3.92  | 10.00 - 12.00 | 0     | 100   | 90.00 - 100.0 | 0     | 100   |
| 0.230 - 0.260 | 0     | 0     | 1.700 - 2.000 | 5.07  | 8.99  | 12.00 - 14.00 | 0     | 100   | 100.0 - 115.0 | 0     | 100   |
| 0.260 - 0.300 | 0     | 0     | 2.000 - 2.300 | 7.68  | 16.67 | 14.00 - 16.00 | 0     | 100   | 115.0 - 130.0 | 0     | 100   |
| 0.300 - 0.330 | 0     | 0     | 2.300 - 2.500 | 6.86  | 23.53 | 16.00 - 18.00 | 0     | 100   | 130.0 - 150.0 | 0     | 100   |
| 0.330 - 0.380 | 0     | 0     | 2.500 - 3.000 | 23.63 | 47.16 | 18.00 - 20.00 | 0     | 100   | 150.0 - 170.0 | 0     | 100   |
| 0.380 - 0.450 | 0     | 0     | 3.000 - 3.500 | 26.32 | 73.48 | 20.00 - 24.00 | 0     | 100   | 170.0 - 200.0 | 0     | 100   |
| 0.450 - 0.500 | 0     | 0     | 3.500 - 4.000 | 17.78 | 91.26 | 24.00 - 28.00 | 0     | 100   | 200.0 - 230.0 | 0     | 100   |
| 0.500 - 0.550 | 0     | 0     | 4.000 - 4.500 | 7.28  | 98.54 | 28.00 - 32.00 | 0     | 100   | 230.0 - 260.0 | 0     | 100   |
| 0.550 - 0.650 | 0     | 0     | 4.500 - 5.000 | 1.46  | 100   | 32.00 - 38.00 | 0     | 100   | 260.0 - 300.0 | 0     | 100   |
| 0.650 - 0.750 | 0     | 0     | 5.000 - 5.500 | 0     | 100   | 38.00 - 45.00 | 0     | 100   | 300.0 - 340.0 | 0     | 100   |

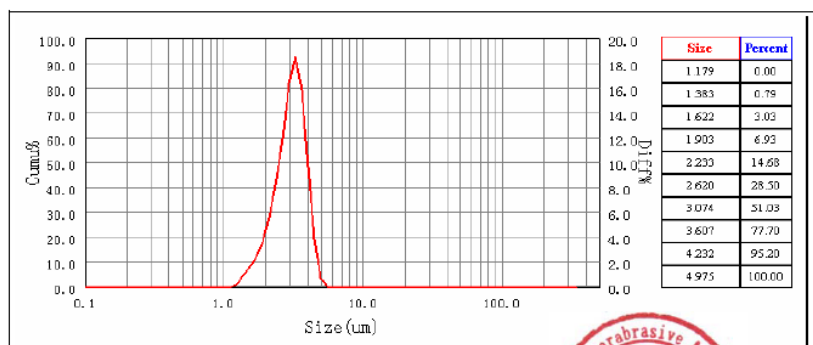

Company:Hunan Real Tech Superabrasive & Tool Co., Ltd.  
Tel:0086-0731-89853480 Fax:0086-0731-89853490

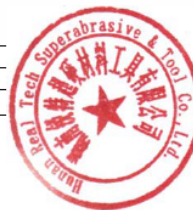

Figure ESI1: Distribution of 2-4 μm diamond particles used

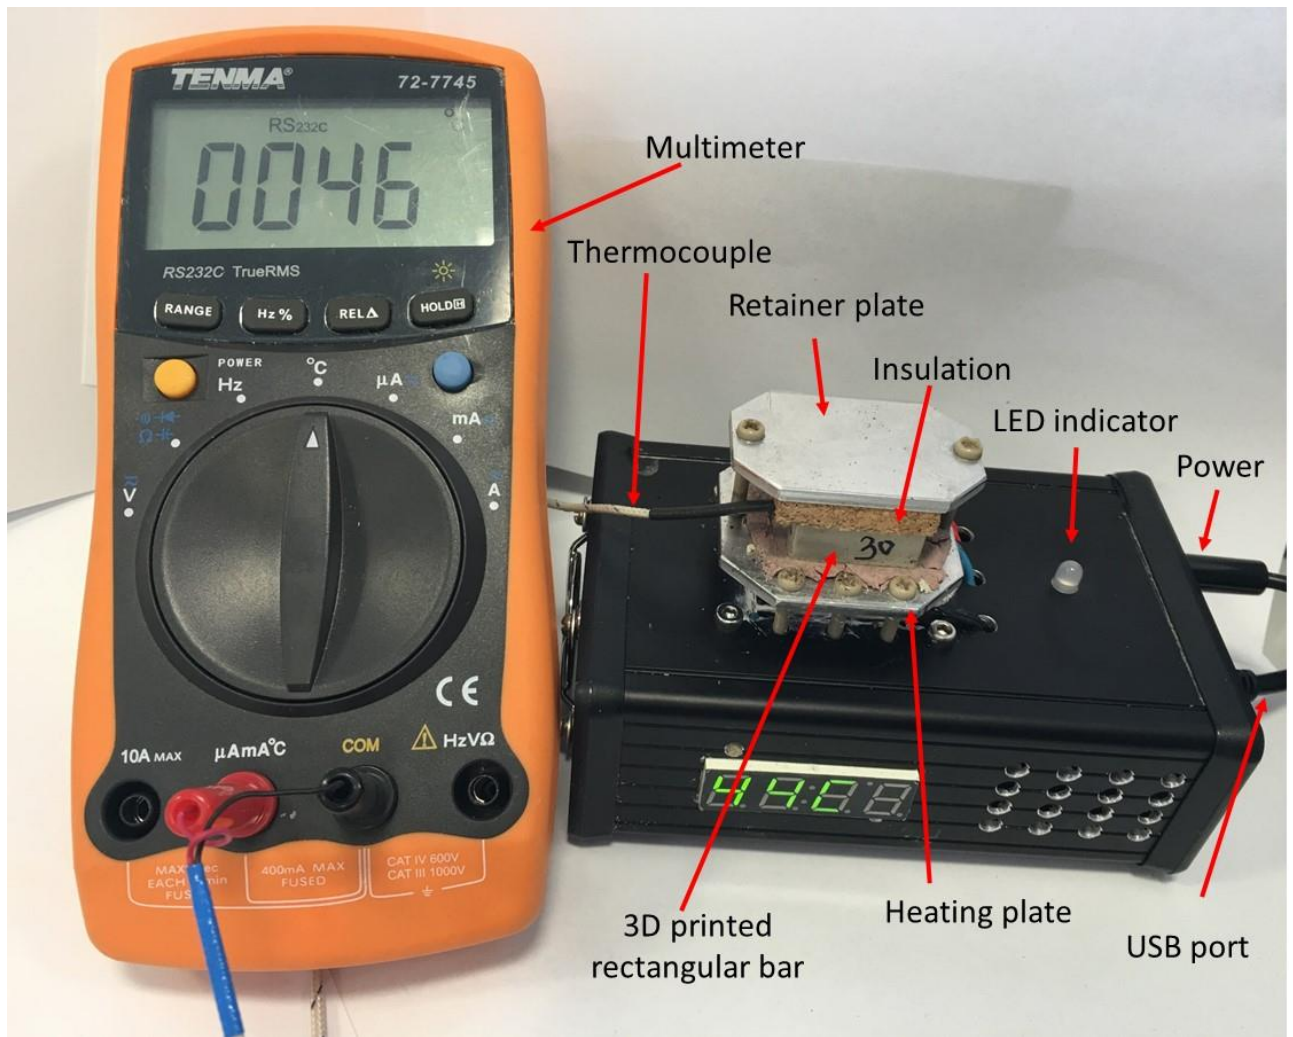

Figure ESI2: Heating system fitted with 3D printed PD-30 composite rectangular bar
